# Supplementary material for: Mapping the Genetic Architecture of Gene Expression in Human Liver
Source: PLOS journal article supplement (doi:10.1371/journal.pbio.0060107), 2008-04-29

A)

# Rps26 Expression in Mouse

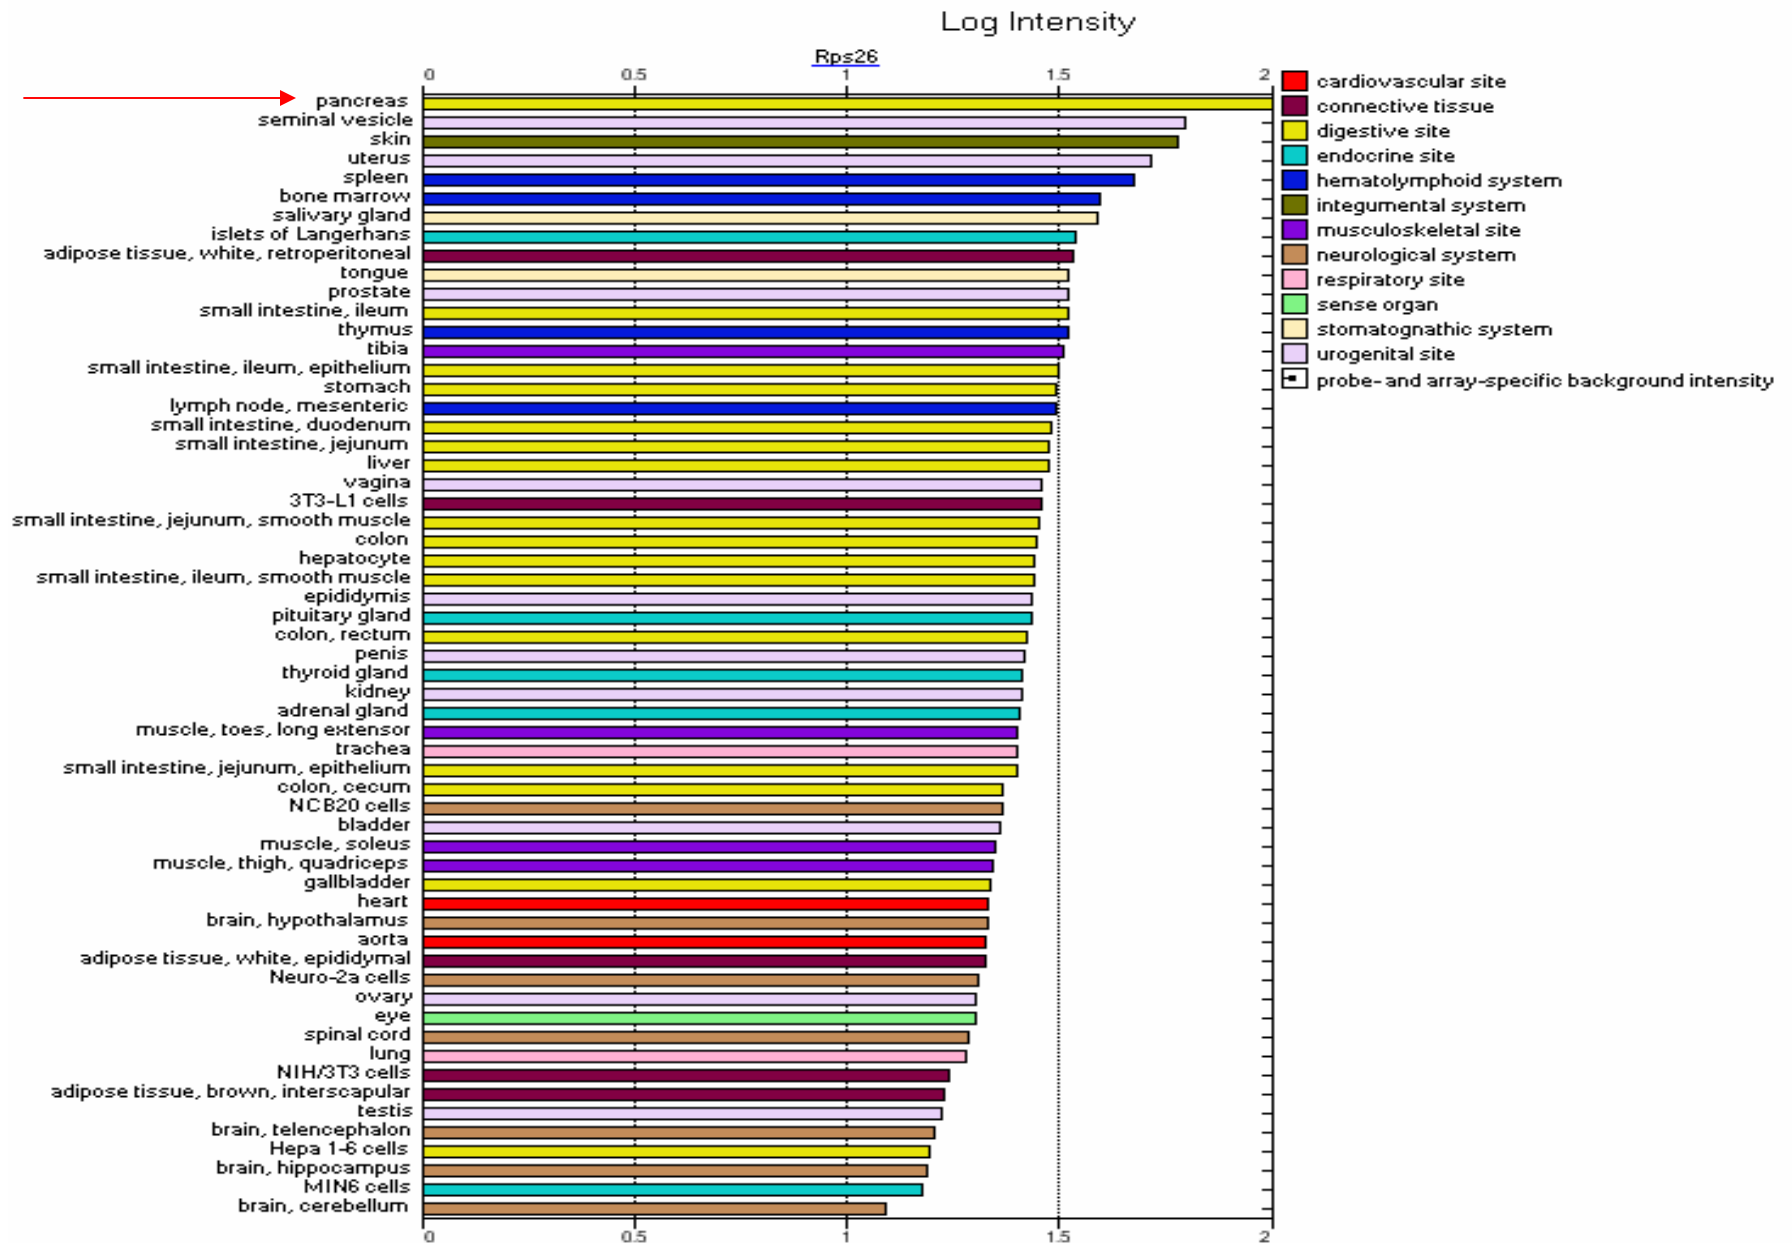

B)

## ErbB3 Expression in Mouse

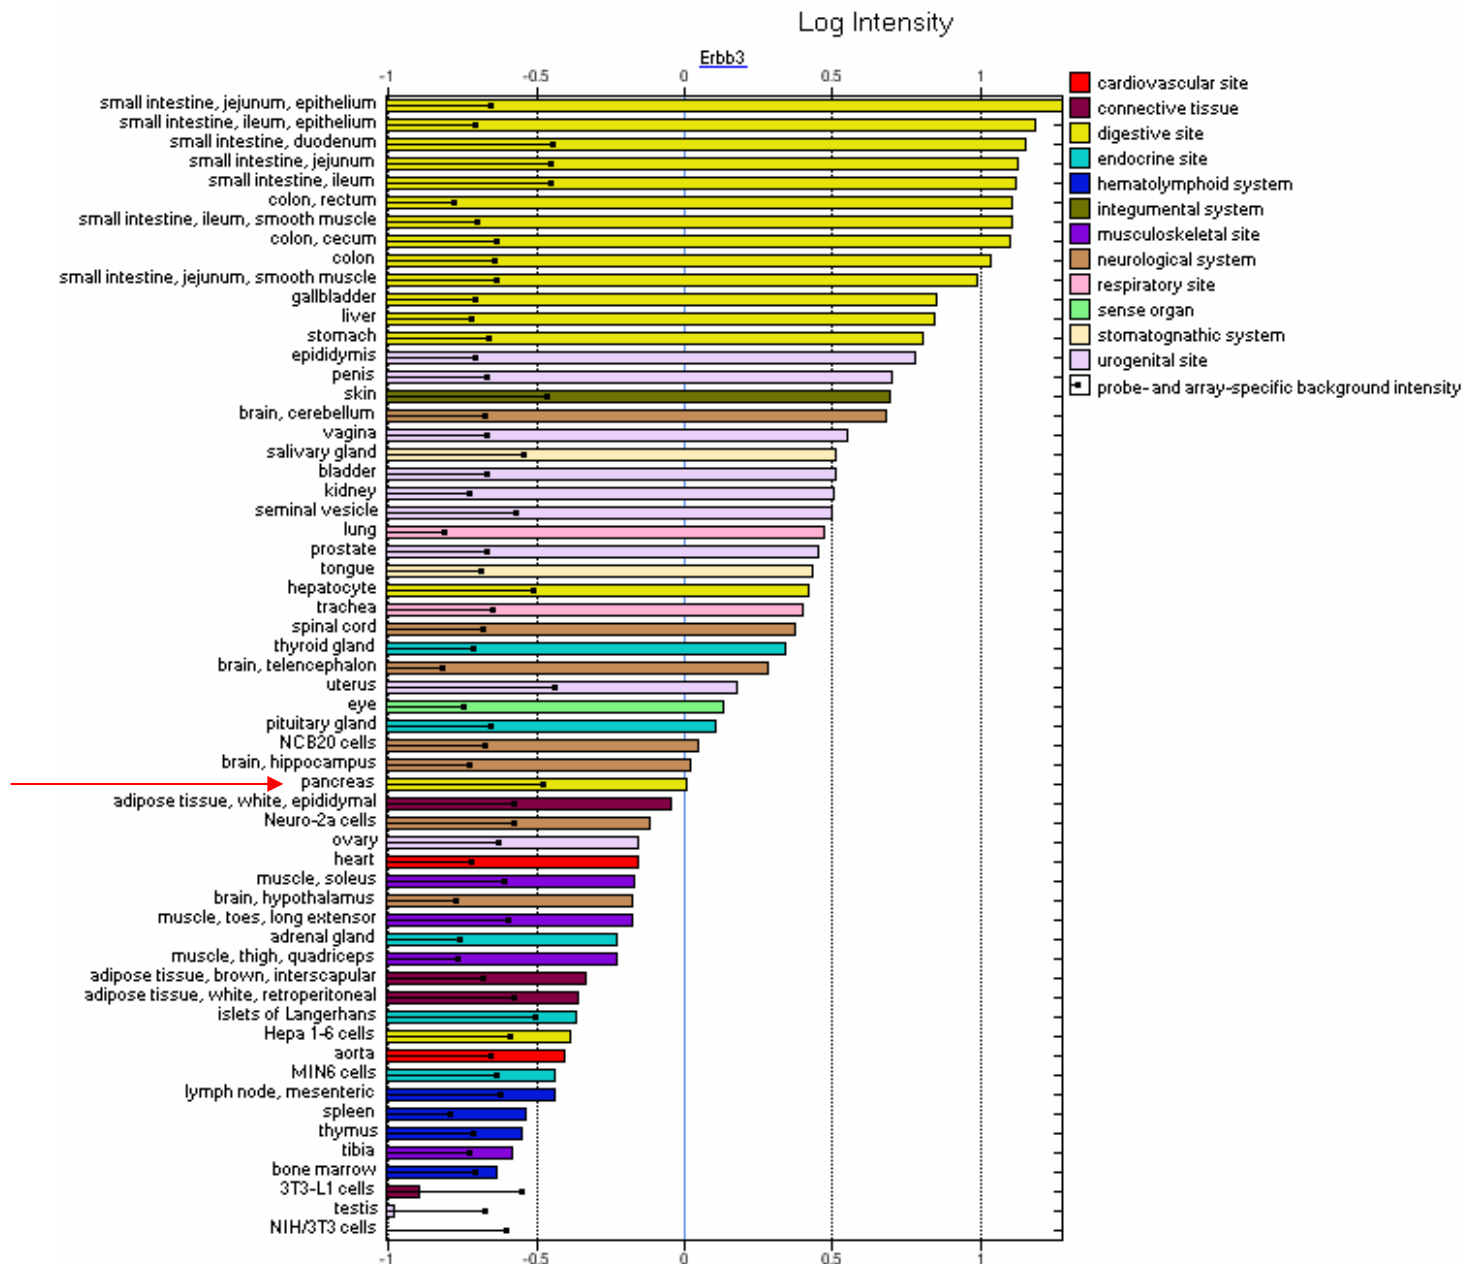

C)

## Rps26 Expression in Monkey

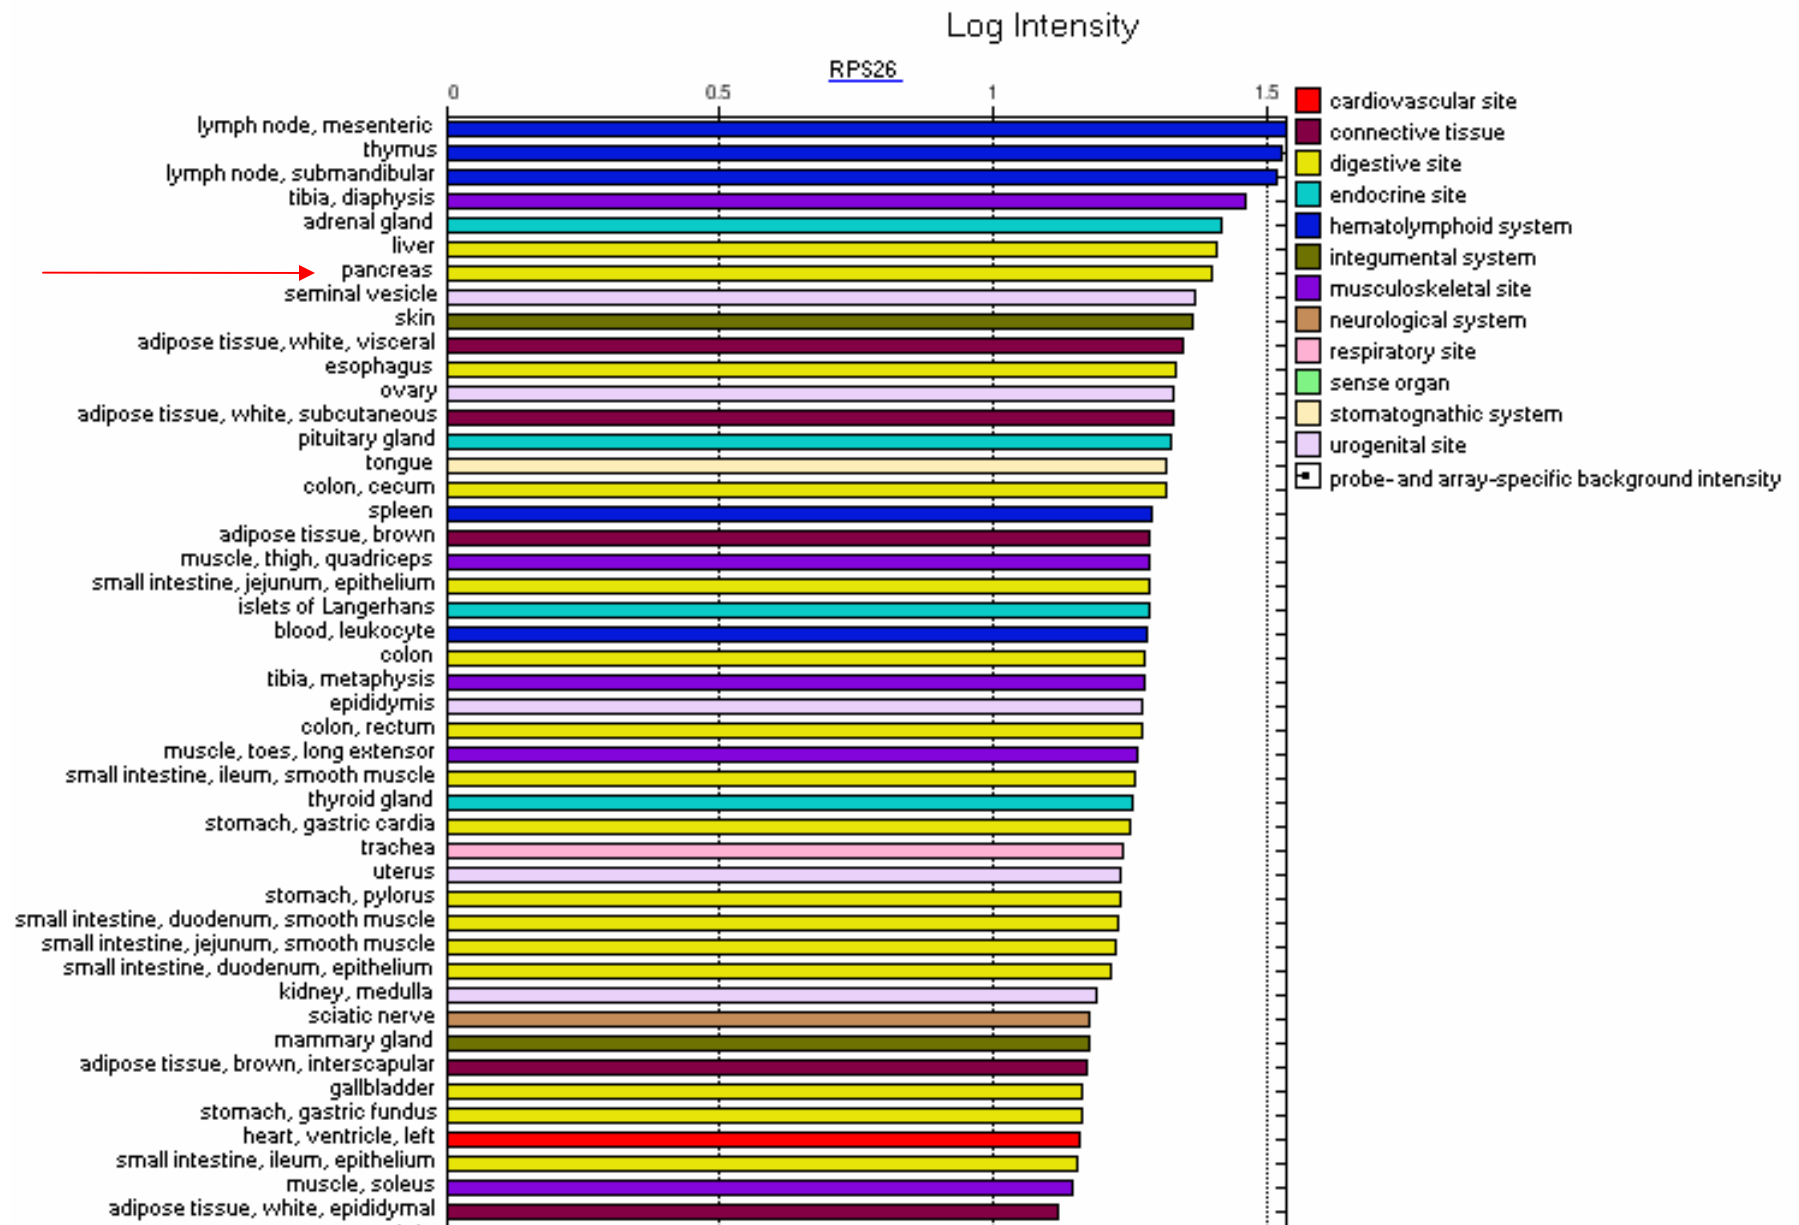

D)

## Erbb3 Expression in Monkey

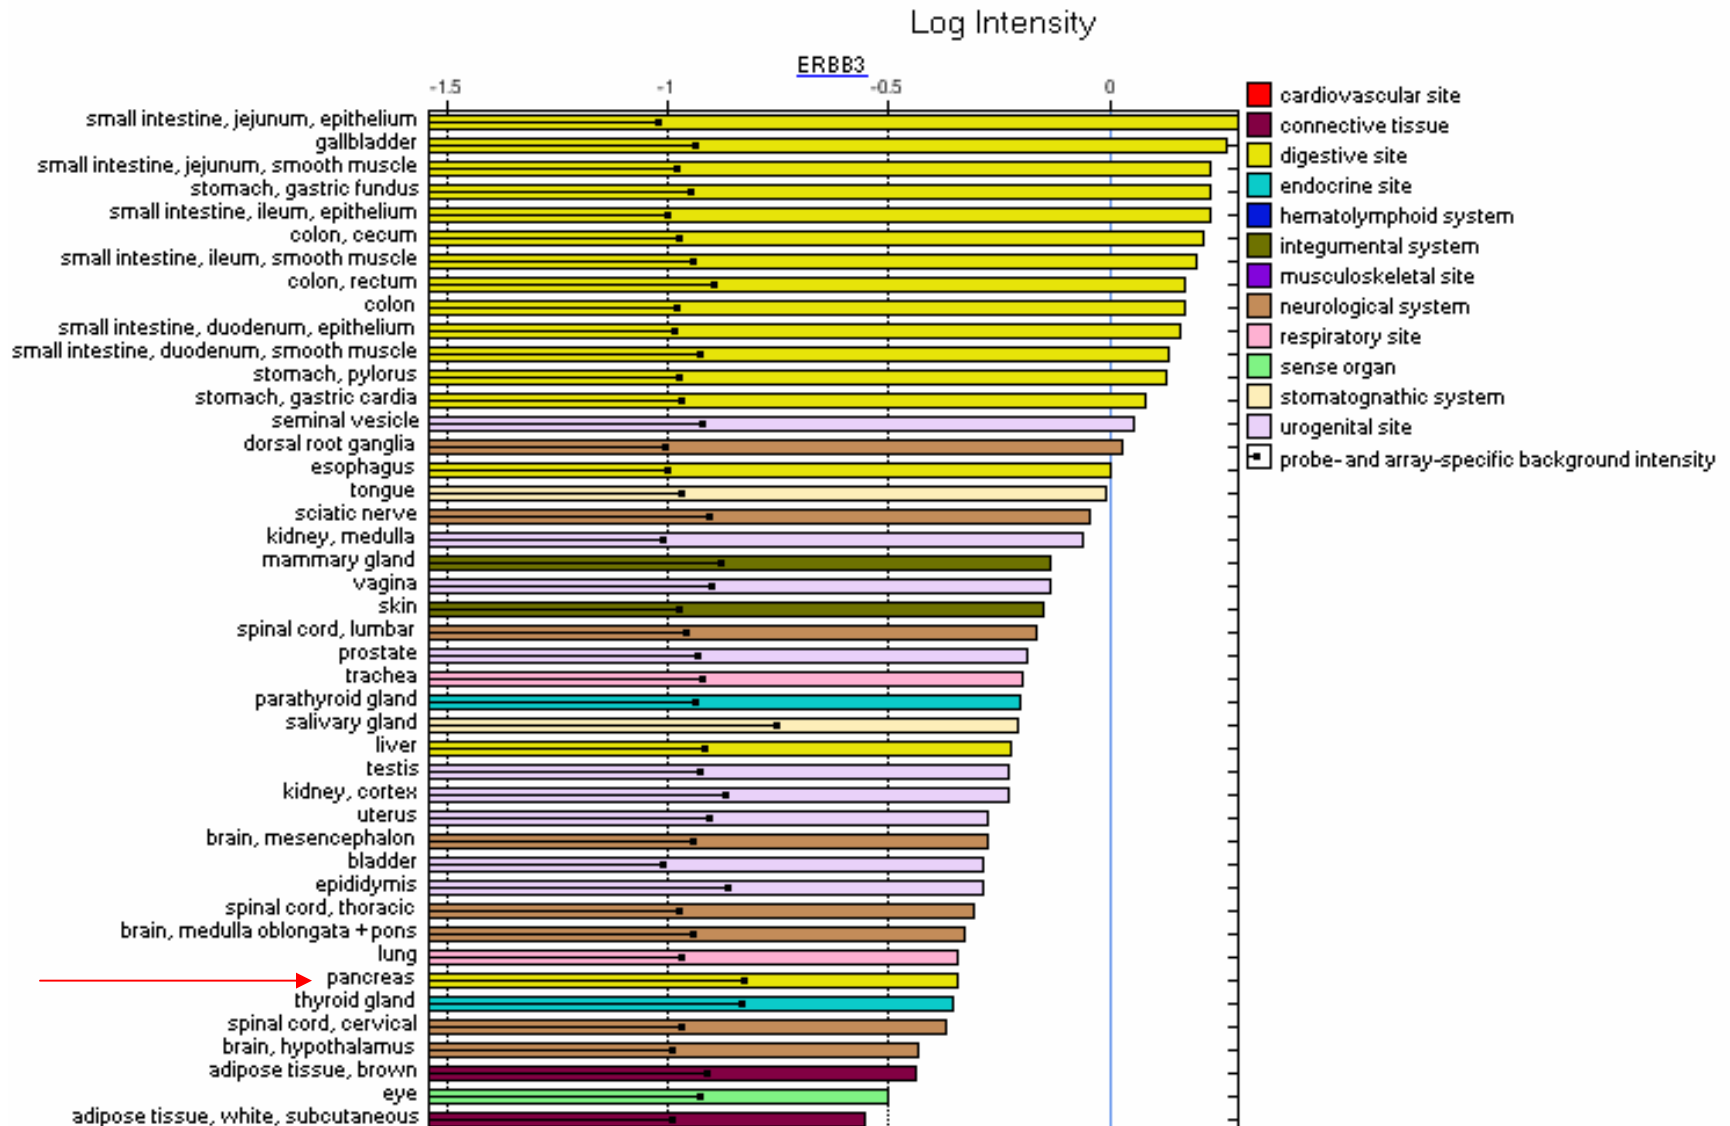

E)

## Rps26 Expression in Human

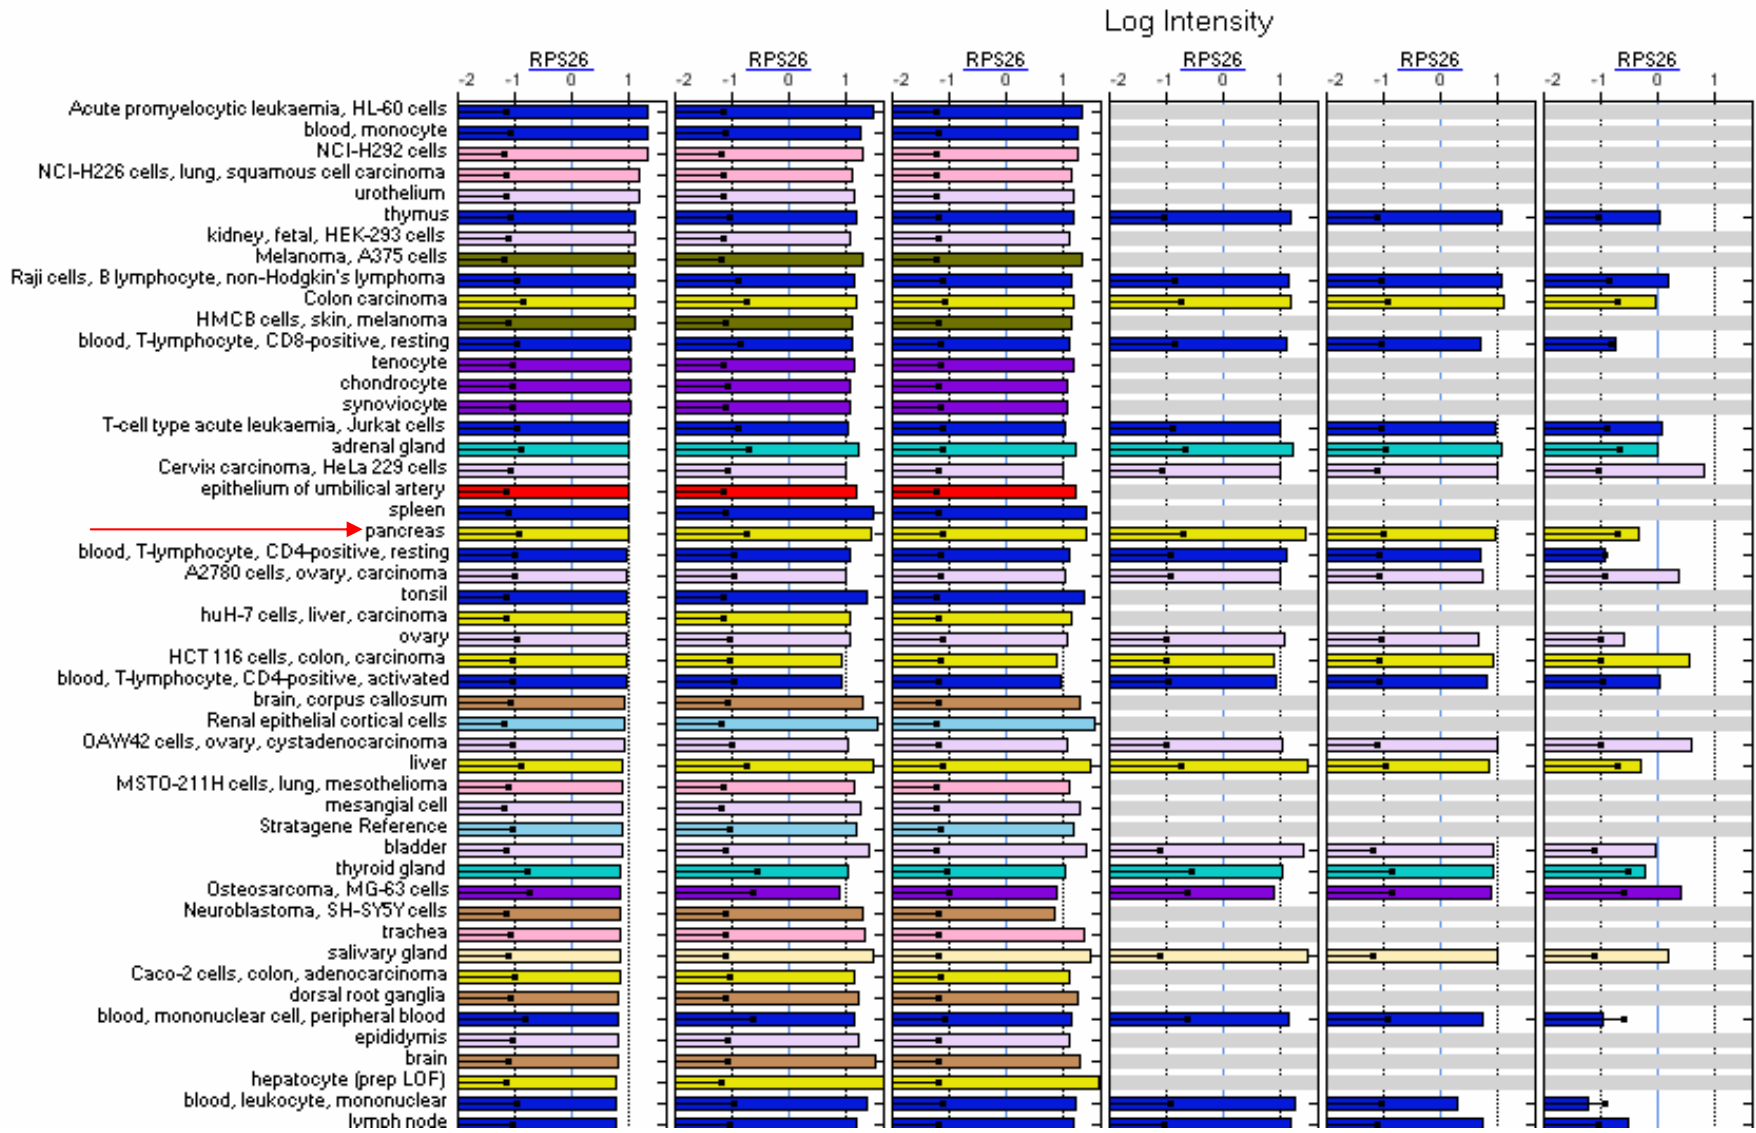

F)

## ErbB3 Expression in Human

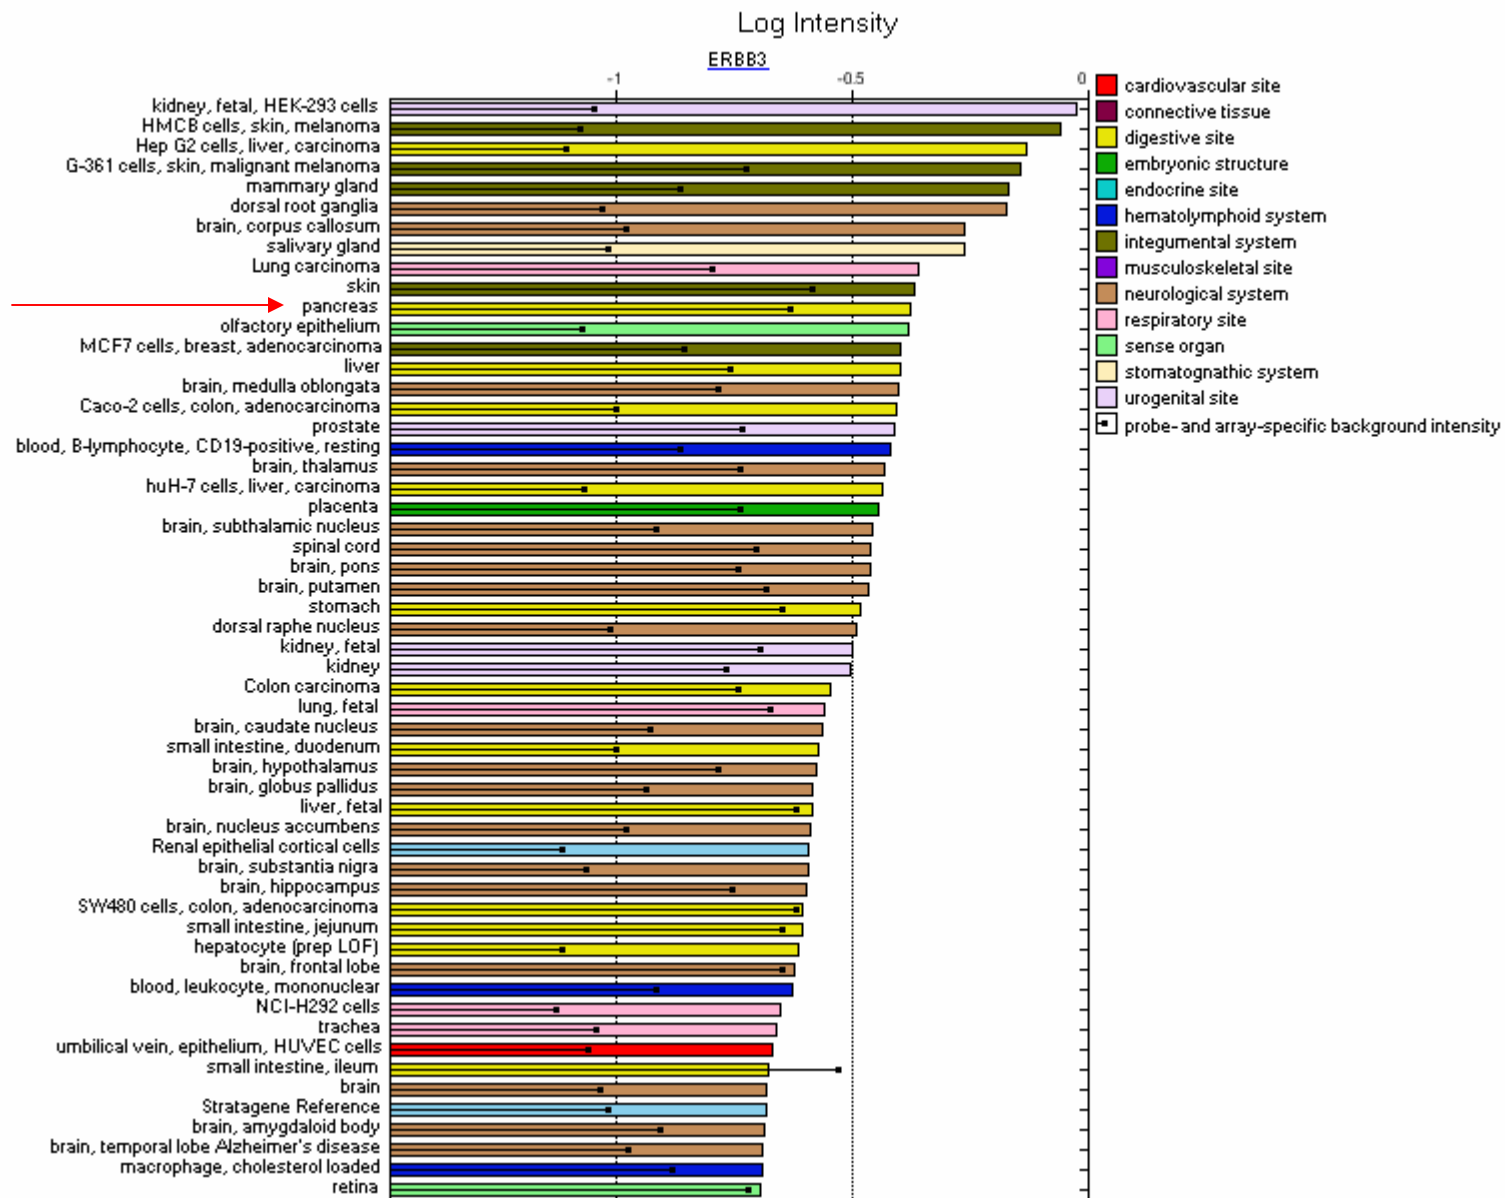

Supplement: S1 (10.1371/journal.pbio.0060107.s001) [file journal.pbio.0060107.s001]
